# Supplementary material for: Ten Years (2011–2021) of the Italian Lombardy ADHD Register for the Diagnosis and Treatment of Children and Adolescents with ADHD
Source: MDPI journal article supplement (doi:10.3390/children8070598), 2021-07-15
Supplement: s1 [file s1]

## Supplementary Material

1. Table S1–3, with Wicoxon effect and V Cramer added
2. Hosmer-Lemeshow test for Table S1 and S2

**Table S1.** Demographic Characteristics of the ADHD patients.

|                                |                       | ADHD yes         | ADHD no          | Total            | p         | Wilcoxon<br>effect<br>size (Z/ $\sqrt{Z}$ ) | V Cramer |
|--------------------------------|-----------------------|------------------|------------------|------------------|-----------|---------------------------------------------|----------|
| Children                       |                       | 4,091            | 1,843            | 5,934            |           |                                             |          |
| Age at<br>diagnosis            | median (q1 - q3)      | 9,0 (7,0 - 11,0) | 9,0 (8,0 - 11,0) | 9,0 (7,0 - 11,0) | <0.0001 * | 4.4705/ $\sqrt{5890}$ =0.<br>0582           |          |
|                                | media (ds)            | 9,2 (2,6)        | 9,4 (2,4)        | 9,2 (2,5)        |           |                                             |          |
|                                | (min - max)           | (5,0 - 17,0)     | (5,0 - 17,0)     | (5,0 - 17,0)     |           |                                             |          |
|                                | Missing               | 30               | 14               | 44               |           |                                             |          |
| School age at<br>diagnosis     | 5-11                  | 3.264 (80.4)     | 1.447 (79.1)     | 4.711 (80.0)     | 0,2635    |                                             | 0.0146   |
|                                | 12-17                 | 797 (19.6)       | 382 (20.9)       | 1.179 (20.0)     |           |                                             |          |
|                                | Missing               | 30               | 14               | 44               |           |                                             |          |
| Gender                         | Female                | 607 (14.8)       | 367 (19.9)       | 974 (16.4)       | <0.0001 * |                                             | 0.0634   |
|                                | Male                  | 3.484 (85.2)     | 1.476 (80.1)     | 4.960 (83.6)     |           |                                             |          |
|                                | Missing               | -                | -                | -                |           |                                             |          |
| Only child                     | Yes                   | 1.054 (25.8)     | 396 (21.5)       | 1.450 (24.5)     | 0,0004    |                                             | 0.0461   |
|                                | No                    | 3.028 (74.2)     | 1.443 (78.5)     | 4.471 (75.5)     |           |                                             |          |
|                                | Missing               | 9                | 4                | 13               |           |                                             |          |
| Born in Italy                  | Yes                   | 3.869 (94.6)     | 1.774 (96.3)     | 5.643 (95.1)     | 0,0067    |                                             | 0.0352   |
|                                | No                    | 220 (5.4)        | 69 (3.7)         | 289 (4.9)        |           |                                             |          |
|                                | Missing               | 2                | -                | 2                |           |                                             |          |
| Adopted                        | Yes                   | 149 (3.6)        | 34 (1.8)         | 183 (3.1)        | 0,0002    |                                             | 0.0481   |
|                                | No                    | 3.938 (96.4)     | 1.807 (98.2)     | 5.745 (96.9)     |           |                                             |          |
|                                | Missing               | 4                | 2                | 6                |           |                                             |          |
| School                         | Primary School        | 3.124 (76.4)     | 1.371 (74.5)     | 4.495 (75.8)     | 0,1124    |                                             | 0.0206   |
|                                | Middle/High<br>School | 964 (23.6)       | 469 (25.5)       | 1.433 (24.2)     |           |                                             |          |
|                                | Missing               | 3                | 3                | 6                |           |                                             |          |
| Support teacher                | Yes                   | 514 (12.6)       | 79 (4.3)         | 593 (10.0)       | <0.0001   |                                             | 0.1277   |
|                                | No                    | 3.577 (87.4)     | 1.764 (95.7)     | 5.341 (90.0)     |           |                                             |          |
|                                | Missing               | -                | -                | -                |           |                                             |          |
| Educational<br>level of mother | Yes                   | 2.313 (56.5)     | 1.116 (60.6)     | 3.429 (57.8)     | 0,0038    |                                             | 0.0376   |
|                                | No                    | 1.778 (43.5)     | 727 (39.4)       | 2.505 (42.2)     |           |                                             |          |
|                                | Missing               | -                | -                | -                |           |                                             |          |
| Educational<br>level of father | Yes                   | 1.865 (45.6)     | 934 (50.7)       | 2.799 (47.2)     | 0,0003    |                                             | 0.0472   |
|                                | No                    | 2.226 (54.4)     | 909 (49.3)       | 3.135 (52.8)     |           |                                             |          |
|                                | Missing               | -                | -                | -                |           |                                             |          |
| Mother<br>employed             | Yes                   | 2.729 (66.7)     | 1.227 (66.6)     | 3.956 (66.7)     | 0,9210    |                                             | 0.0013   |
|                                | No                    | 1.362 (33.3)     | 616 (33.4)       | 1.978 (33.3)     |           |                                             |          |
|                                | Missing               | -                | -                | -                |           |                                             |          |
| Father<br>employed             | Yes                   | 3.411 (83.4)     | 1.624 (88.1)     | 5.035 (84.9)     | <0.0001   |                                             | 0.0612   |
|                                | No                    | 680 (16.6)       | 219 (11.9)       | 899 (15.1)       |           |                                             |          |
|                                | Missing               | -                | -                | -                |           |                                             |          |
| ADHD<br>familiarity            | Yes                   | 831 (20.3)       | 193 (10.5)       | 1.024 (17.3)     | <0.0001   |                                             | 0.1205   |
|                                | No                    | 3.260 (79.7)     | 1.650 (89.5)     | 4.910 (82.7)     |           |                                             |          |
|                                | Missing               | -                | -                | -                |           |                                             |          |
| Psychiatric<br>comorbidity     | Yes                   | 2.879 (70.4)     | 1.079 (58.5)     | 3.958 (66.7)     | <0.0001   |                                             | 0.1161   |
|                                | No                    | 1.212 (29.6)     | 764 (41.5)       | 1.976 (33.3)     |           |                                             |          |
|                                | Missing               | -                | -                | -                |           |                                             |          |

|                                                             |                       |              |              |                         |         |        |
|-------------------------------------------------------------|-----------------------|--------------|--------------|-------------------------|---------|--------|
| Type of comorbidity (flag)                                  | Learning disorder     | 1.594 (39.0) | 613 (33.3)   | 2.207 (37.2)            | <0.0001 | 0.0546 |
|                                                             | Sleeping disorder     | 582 (14.2)   | 145 (7.9)    | 727 (12.3)              | <0.0001 | 0.0897 |
|                                                             | ODD                   | 569 (13.9)   | 93 (5.0)     | 662 (11.2)              | <0.0001 | 0.1303 |
|                                                             | Anxiety               | 280 (6.8)    | 162 (8.8)    | 442 (7.4)               | 0,0083  | 0.0343 |
|                                                             | Language disorder     | 287 (7.0)    | 88 (4.8)     | 375 (6.3)               | 0,0010  | 0.0426 |
|                                                             | Tic                   | 95 (2.3)     | 22 (1.2)     | 117 (2.0)               | 0,0038  | 0.0376 |
|                                                             | Conduct disorder      | 69 (1.7)     | 41 (2.2)     | 110 (1.9)               | 0,1551  | 0.0185 |
|                                                             | Coordination disorder | 95 (2.3)     | 23 (1.2)     | 118 (2.0)               | 0,0061  | 0.0356 |
| Chronic disease                                             | Yes                   | 265 (6.5)    | 122 (6.6)    | 387 (6.5)               | 0,8376  | 0.0027 |
|                                                             | No Missing            | 3.826 (93.5) | 1.721 (93.4) | 5.547 (93.5)            |         |        |
| Type of chronic disease (flag)                              | Neurological          | 91 (2.2)     | 30 (1.6)     | 121 (2.0)               | 0,1324  | 0.0195 |
|                                                             | Breathing             | 60 (1.5)     | 32 (1.7)     | 92 (1.6)                | 0,4365  | 0.0101 |
|                                                             | Gastrointestinal      | 18 (0.4)     | 11 (0.6)     | 29 (0.5)                | 0,4227  | 0.0104 |
| <b>Test della bontà di adattamento di Hosmer e Lemeshow</b> |                       |              |              |                         |         |        |
| <b>Chi-quadrato</b>                                         |                       | <b>DF</b>    |              | <b>Pr &gt; ChiQuadr</b> |         |        |
| <b>15.3161</b>                                              |                       | <b>8</b>     |              | <b>0.0533</b>           |         |        |

Since  $p > 0.05$  there isn't an evidence of lack of fit.

**Table S2.** Clinical Characteristics of the ADHD Patients by Treatment Prescription.

|                               |                            | Pharmacological<br>Treatment | Psychological<br>Treatment | Total        | p         | V di Cramer |
|-------------------------------|----------------------------|------------------------------|----------------------------|--------------|-----------|-------------|
|                               |                            | 734                          | 3,282                      | 4,016        |           |             |
| ADHD Subtype                  | Combined                   | 586 (79.8)                   | 1.899 (57.9)               | 2.485 (61.9) | <0.0001 * | 0.1752      |
|                               | Inattentive                | 122 (16.6)                   | 1.096 (33.4)               | 1.218 (30.3) |           |             |
|                               | Hyperactive                | 26 (3.5)                     | 287 (8.7)                  | 313 (7.8)    |           |             |
|                               | Missing                    | -                            | -                          | -            |           |             |
| QI pathologic                 | Yes                        | 82 (11.4)                    | 79 (2.4)                   | 161 (4.1)    | <0.0001 * | 0.1755      |
|                               | No                         | 635 (88.6)                   | 3.166 (97.6)               | 3.801 (95.9) |           |             |
|                               | Missing                    | 17                           | 37                         | 54           |           |             |
| CPRS-O                        | Pathological               | 384 (63.6)                   | 1.305 (42.6)               | 1.689 (46.0) | <0.0001 * | 0.1563      |
|                               | Normal                     | 220 (36.4)                   | 1.761 (57.4)               | 1.981 (54.0) |           |             |
|                               | Missing                    | 130                          | 216                        | 346          |           |             |
| CTRS-O                        | Pathological               | 310 (59.0)                   | 1.219 (41.7)               | 1.529 (44.3) | <0.0001 * | 0.1257      |
|                               | Normal                     | 215 (41.0)                   | 1.707 (58.3)               | 1.922 (55.7) |           |             |
|                               | Missing                    | 209                          | 356                        | 565          |           |             |
| CPRS-I                        | Pathological               | 515 (85.3)                   | 2.176 (70.9)               | 2.691 (73.3) | <0.0001 * | 0.1201      |
|                               | Normal                     | 89 (14.7)                    | 892 (29.1)                 | 981 (26.7)   |           |             |
|                               | Missing                    | 130                          | 214                        | 344          |           |             |
| CTRS-I                        | Pathological               | 362 (69.0)                   | 1.717 (58.6)               | 2.079 (60.2) | <0.0001 * | 0.0756      |
|                               | Normal                     | 163 (31.0)                   | 1.211 (41.4)               | 1.374 (39.8) |           |             |
|                               | Missing                    | 209                          | 354                        | 563          |           |             |
| CPRS-H                        | Pathological               | 477 (79.0)                   | 1.840 (60.0)               | 2.317 (63.1) | <0.0001 * | 0.1460      |
|                               | Normal                     | 127 (21.0)                   | 1.228 (40.0)               | 1.355 (36.9) |           |             |
|                               | Missing                    | 130                          | 214                        | 344          |           |             |
| CTRS-H                        | Pathological               | 403 (76.6)                   | 1.893 (64.7)               | 2.296 (66.5) | <0.0001 * | 0.0911      |
|                               | Normal                     | 123 (23.4)                   | 1.035 (35.3)               | 1.158 (33.5) |           |             |
|                               | Missing                    | 208                          | 354                        | 562          |           |             |
| CPRS-ADHD                     | Pathological               | 557 (92.2)                   | 2.371 (77.3)               | 2.928 (79.7) | <0.0001 * | 0.1378      |
|                               | Normal                     | 47 (7.8)                     | 697 (22.7)                 | 744 (20.3)   |           |             |
|                               | Missing                    | 130                          | 214                        | 344          |           |             |
| CTRS-ADHD                     | Pathological               | 459 (87.3)                   | 2.285 (78.1)               | 2.744 (79.5) | <0.0001 * | 0.0818      |
|                               | Normal                     | 67 (12.7)                    | 642 (21.9)                 | 709 (20.5)   |           |             |
|                               | Missing                    | 208                          | 355                        | 563          |           |             |
| CGI-S                         | 5-7                        | 516 (71.9)                   | 597 (18.8)                 | 1.113 (28.6) | <0.0001 * | 0.4553      |
|                               | 1-4                        | 202 (28.1)                   | 2.575 (81.2)               | 2.777 (71.4) |           |             |
|                               | Missing                    | 16                           | 110                        | 126          |           |             |
| Psychiatric<br>comorbidity    | Yes                        | 612 (83.4)                   | 2.215 (67.5)               | 2.827 (70.4) | <0.0001 * | 0.1345      |
|                               | No                         | 122 (16.6)                   | 1.067 (32.5)               | 1.189 (29.6) |           |             |
|                               | Missing                    | -                            | -                          | -            |           |             |
| Type of<br>comorbidity (flag) | Learning Disorder          | 265 (36.1)                   | 1.296 (39.5)               | 1.561 (38.9) | 0,0890    | 0.0268      |
|                               | Sleeping disorder          | 130 (17.7)                   | 443 (13.5)                 | 573 (14.3)   | 0.0032 *  | 0.0466      |
|                               | ODD                        | 209 (28.5)                   | 356 (10.8)                 | 565 (14.1)   | <0.0001 * | 0.1959      |
|                               | Anxiety                    | 70 (9.5)                     | 208 (6.3)                  | 278 (6.9)    | 0.0020 *  | 0.0487      |
|                               | Intellectual<br>disability | 94 (12.8)                    | 150 (4.6)                  | 244 (6.1)    | <0.0001 * | 0.1332      |
|                               | Mood disorder              | 57 (7.8)                     | 170 (5.2)                  | 227 (5.7)    | 0.0061 *  | 0.0433      |
|                               | Language<br>disorder       | 61 (8.3)                     | 221 (6.7)                  | 282 (7.0)    | 0,1307    | 0.0239      |
|                               | Tic                        | 40 (5.4)                     | 54 (1.6)                   | 94 (2.3)     | <0.0001 * | 0.0972      |
|                               | Conduct disorder           | 29 (4.0)                     | 39 (1.2)                   | 68 (1.7)     | <0.0001 * | 0.0828      |
|                               | Autism                     | 60 (8.2)                     | 65 (2.0)                   | 125 (3.1)    | <0.0001 * | 0.1378      |
|                               | Coordination<br>disorder   | 28 (3.8)                     | 63 (1.9)                   | 91 (2.3)     | 0.0018 *  | 0.0492      |
|                               | Other                      | 17 (2.3)                     | 66 (2.0)                   | 83 (2.1)     | 0,5994    | 0.0083      |

| Test della bontà di adattamento di Hosmer e Lemeshow |    |               |
|------------------------------------------------------|----|---------------|
| Chi-quadrato                                         | DF | Pr > ChiQuadr |
| 7.2808                                               | 3  | 0.0635        |

Since  $p > 0.05$  there isn't an evidence of lack of fit.

**Table S3.** Symptoms severity perceptions by parents and teachers.

| Conners' Rating Scales | Score        | CPRS         | CTRS         | p        | V    | K (IC 95%)         | Agreement % |
|------------------------|--------------|--------------|--------------|----------|------|--------------------|-------------|
| Subscales              |              | 4,909        | 4,909        |          |      |                    |             |
| O                      | Pathological | 1.938 (39.5) | 1.884 (38.4) | 0,2637   | 0.01 | 0.32 (0.29 - 0.35) | 68          |
|                        | Normal       | 2.971 (60.5) | 3.025 (61.6) |          |      |                    |             |
| I                      | Pathological | 3.270 (66.6) | 2.682 (54.6) | <0.0001  | 0.12 | 0.25 (0.22 - 0.28) | 64          |
|                        | Normal       | 1.639 (33.4) | 2.227 (45.4) |          |      |                    |             |
| H                      | Pathological | 2.646 (53.9) | 2.846 (58.0) | <0.0001  | 0.04 | 0.31 (0.28 - 0.34) | 66          |
|                        | Normal       | 2.263 (46.1) | 2.063 (42.0) |          |      |                    |             |
| ADHD Index             | Pathological | 3.530 (71.9) | 3.478 (70.8) | 0,2456   | 0.01 | 0.26 (0.23 - 0.29) | 70          |
|                        | Normal       | 1.379 (28.1) | 1.431 (29.2) |          |      |                    |             |
| E                      | Pathological | 1.645 (33.5) | 1.942 (39.6) | <0.0001  | 0.06 | 0.26 (0.23 - 0.29) | 65          |
|                        | Normal       | 3.264 (66.5) | 2.967 (60.4) |          |      |                    |             |
| CBCL                   | Score        | Mother       | Father       | p        | V    | K (IC 95%)         | Agreement % |
|                        |              | 1,082        | 1,082        |          |      |                    |             |
| I                      | Pathological | 223 (20.6)   | 159 (14.7)   | 0.0003   | 0.08 | 0.64 (0.58 - 0.70) | 89          |
|                        | Normal       | 859 (79.4)   | 923 (85.3)   |          |      |                    |             |
| E                      | Pathological | 254 (23.5)   | 204 (18.9)   | 0.0085   | 0.06 | 0.69 (0.63 - 0.74) | 89          |
|                        | Normal       | 828 (76.5)   | 878 (81.1)   |          |      |                    |             |
| T                      | Pathological | 349 (32.3)   | 255 (23.6)   | < 0.0001 | 0.10 | 0.66 (0.61 - 0.71) | 86          |
|                        | Normal       | 733 (67.7)   | 827 (76.4)   |          |      |                    |             |
